# Supplementary material for: Dual Functions of V/SiOx/AlOy/p++Si Device as Selector and Memory
Source: Nanoscale Res Lett. 2018 Aug 23;13:252. doi: 10.1186/s11671-018-2660-9 (PMC6107449; doi:10.1186/s11671-018-2660-9)
Supplement: Supplementary file 1 — Supporting information. (DOCX 81 kb) [file 11671_2018_2660_MOESM1_ESM.docx]

**Dual functions of V/SiO*x*/AlO*y*/p++Si device as selector and memory**

Sungjun Kim1, Chih-Yang Lin2, Min-Hwi Kim3, Tae-Hyeon Kim3, Hyungjin Kim3,

Ying-Chen Chen4, Yao-Feng Chang5*, and Byung-Gook Park3*

*1School of Electronics Engineering, Chungbuk National University, Cheongju 28644, Republic of Korea*

*2Department of Physics, National Sun Yat-sen University, Kaohsiung 804, Taiwan*

*3Department of Electrical and Computer Engineering, Inter-University Semiconductor Research Center (ISRC), Seoul National University, Seoul 08826, South Korea*

*4Department of Electrical and Computer Engineering, Microelectronics Research Center, University of Texas at Austin, Austin, Texas 78758, USA*

*5Micron Technology, Inc., Boise, ID 83716, USA*

To analyze the SiO*x* and AlO*y* films deposited in our laboratory. X-ray photoelectron spectroscopy (XPS) analysis was performed by using a Thermo VG ESCA Sigma Probe spectrometer operated at 15 kV and 100 W with a monochromatric Al-Ka radiation source. The calibration of the binding-energy scale was set by fixing the C 1s at 284.5 eV.

Figure S1 XPS spectra of SiO*x* film: Si 2p (a) and O 1s (b) and AlO*y* film: Al 2p (c) and O 1s (d).

Figure S2 Negative forming of V/SiO*x*/AlO*y*/p++-Si device.
